# Supplementary material for: Target of Rapamycin Regulates Photosynthesis and Cell Growth in Auxenochlorella pyrenoidosa
Source: MDPI journal article supplement (doi:10.3390/ijms231911309), 2022-09-25
Supplement: s1 [file s1]

# Target of rapamycin regulates photosynthesis and cell growth in *Auxenochlorella pyrenoidosa*

Tingting Zhu<sup>1,2,†</sup>, Linxuan Li<sup>1,2,3,†</sup>, Huimin Chang<sup>3</sup>, Jiasui Zhan<sup>4,\*</sup> and Maozhi Ren<sup>1,2,3,\*</sup>

## Supplementary Figures and Tables

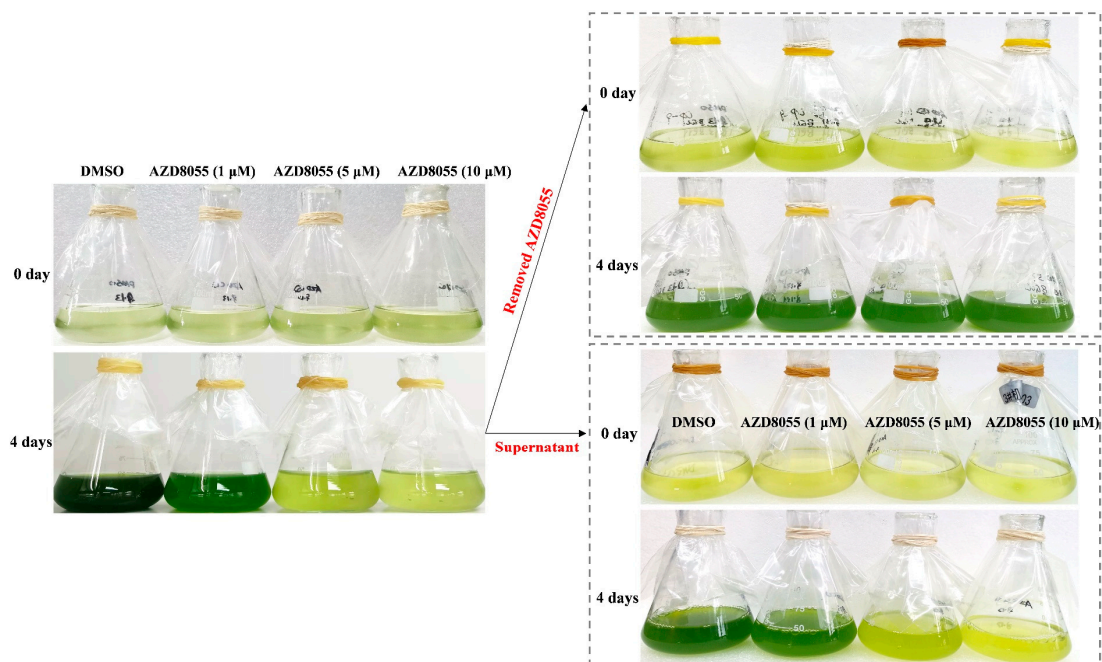

**Supplementary Figure S1.** Inhibition of ApTOR kinase activity by AZD8055 prevents cell division in *Auxenochlorella pyrenoidosa*. *A. pyrenoidosa* cells were treated with 1, 5 and 10 μM AZD8055 for 4 days, and AZD8055 was removed from the medium, then the pellet was resuspended with BG11 and adjusted to the same OD value. Meanwhile, the removed supernatant containing different concentrations of AZD8055 was added into fresh *A. pyrenoidosa* cells. The phenotype was observed after culturing with or without AZD8055 for 4 days.

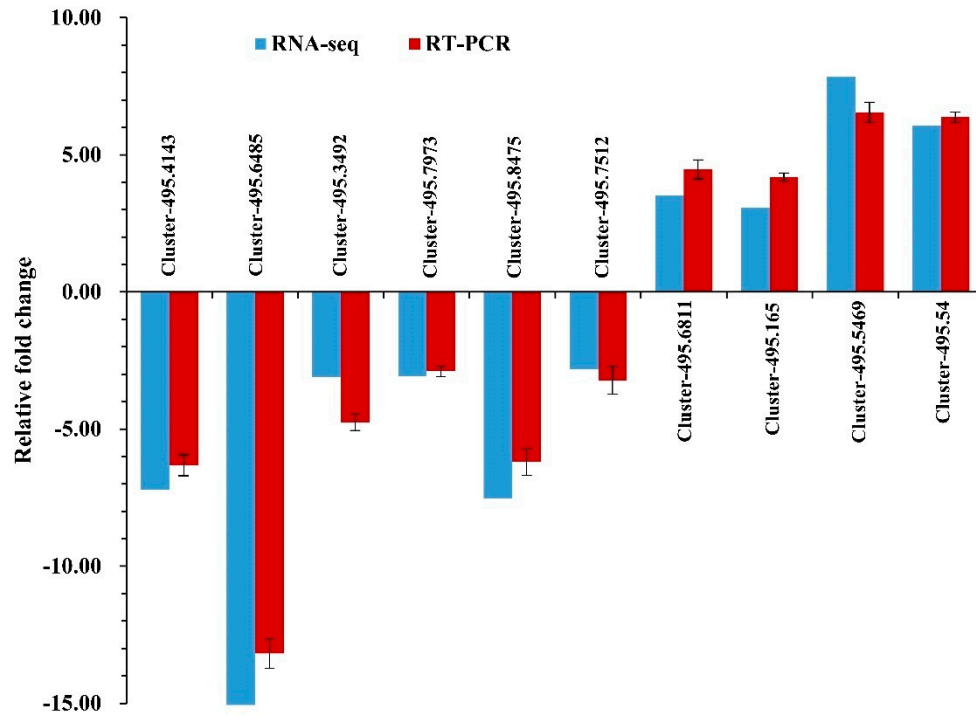

**Supplementary Figure S2.** Gene expression levels of differentially expressed genes both in the real time PCR and RNA-seq data. The data were expressed as the mean  $\pm$  SD of three independent experiments.

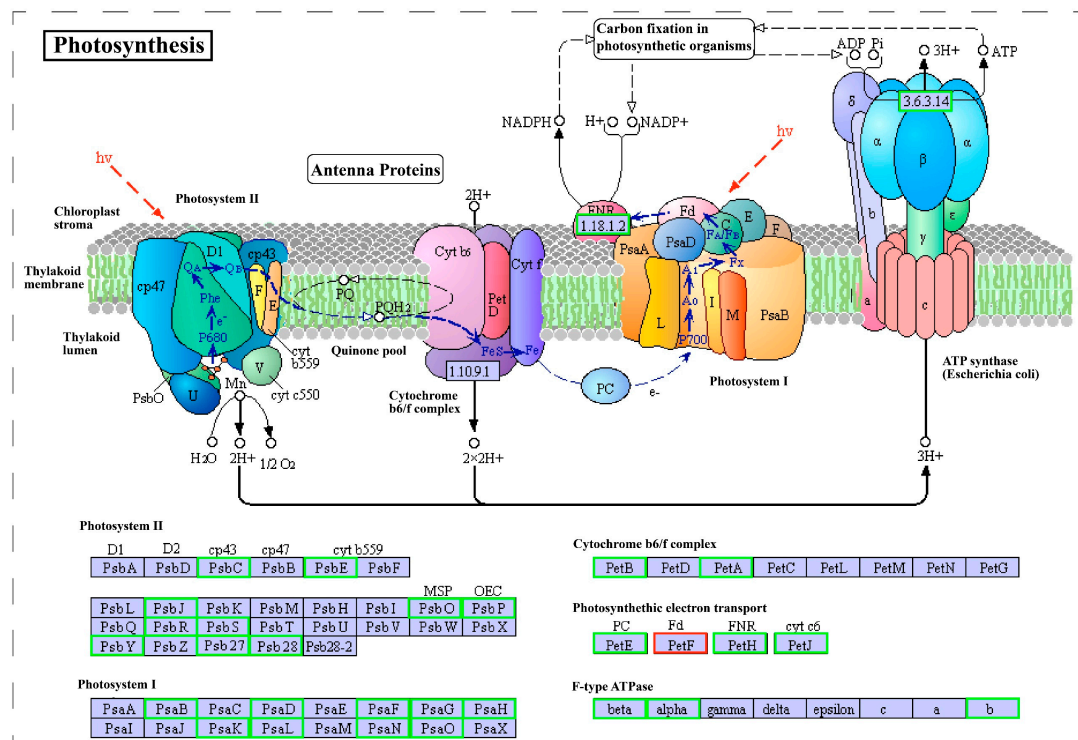

**Supplementary Figure S3.** ApTOR regulates photosynthesis in *Auxenochlorella pyrenoidosa*. Green boxes denote down-regulated genes, and red boxes represent up-regulated genes.

**Supplementary Table S1. Summary of the RNA-seq data**

| Sample | Raw Reads | Clean Reads | Clean Bases | Error Rate (%) | Q20 (%) | Q30 (%) | GC Content (%) |
|--------|-----------|-------------|-------------|----------------|---------|---------|----------------|
| DMSO_1 | 25408251  | 23944899    | 7.18 G      | 0.03           | 96.72   | 92.14   | 66.72          |
| DMSO_2 | 23103782  | 21669919    | 6.50 G      | 0.03           | 96.87   | 92.53   | 66.61          |
| DMSO_3 | 23996010  | 22234144    | 6.67 G      | 0.03           | 96.91   | 92.50   | 66.54          |
| AZD_1  | 27706690  | 26271415    | 7.88 G      | 0.03           | 97.16   | 92.96   | 66.23          |
| AZD_2  | 23889753  | 23363899    | 7.01 G      | 0.03           | 96.65   | 92.00   | 66.45          |
| AZD_3  | 23169941  | 22681356    | 6.80 G      | 0.03           | 97.60   | 94.12   | 66.45          |

**Supplementary Table S2. DEGs in chloroplast biogenesis and development**

| Gene ID                                       | Log <sub>2</sub> (Fold change) | P-adj    | KO Name    | KO Description                       |
|-----------------------------------------------|--------------------------------|----------|------------|--------------------------------------|
| <b>Porphyrin and chlorophyll biosynthesis</b> |                                |          |            |                                      |
| Cluster-495.6688                              | -4.7867                        | 7.71E-73 | chlP, bchP | Geranylgeranyl diphosphate reductase |
| Cluster-495.7988                              | -4.3298                        | 1.63E-18 | bchM, chlM | Geranylgeranyl reductase             |
| Cluster-495.3211                              | -3.8931                        | 1.64E-42 | hemL       | Glutamate semialdehyde aminomutase   |
| Cluster-495.6256                              | -3.2222                        | 1.75E-37 | chlH, bchH | Magnesium chelatase subunit H        |
| Cluster-495.7219                              | -3.2049                        | 6.40E-17 | por        | Protochlorophyllide reductase        |
| Cluster-495.678                               | -3.1809                        | 5.39E-03 | UROS       | Uroporphyrinogen-III synthase        |
| Cluster-495.9572                              | -3.0728                        | 6.34E-11 | CPOX       | Coproporphyrinogen III oxidase       |
| Cluster-495.8937                              | -2.9705                        | 1.72E-20 | HMBS       | Hydroxymethylbilane synthase         |
| Cluster-495.6372                              | -2.6989                        | 3.57E-18 | hemB       | Porphobilinogen synthase             |
| Cluster-495.7885                              | -2.0294                        | 9.90E-12 | chlD, bchD | Magnesium chelatase subunit D        |
| Cluster-495.3171                              | -2.0066                        | 5.03E-13 | CPOX       | Coproporphyrinogen III oxidase       |
| Cluster-495.7024                              | -1.9459                        | 1.91E-11 | UROD       | Uroporphyrinogen decarboxylase       |
| Cluster-495.6966                              | -1.8103                        | 1.84E-17 | acsF, chlE | Magnesium-protoporphyrin cyclase     |
| Cluster-495.7973                              | -1.6219                        | 6.59E-06 | CAO        | Chlorophyllide a oxygenase           |
| Cluster-495.5687                              | -1.1905                        | 1.14E-10 | hemA       | Glutamyl-tRNA reductase              |
| Cluster-495.4976                              | -1.1750                        | 4.45E-05 | CPOX       | Coproporphyrinogen III oxidase       |
| <b>Thylakoid</b>                              |                                |          |            |                                      |
| Cluster-495.8121                              | -6.8519                        | 7.01E-07 | --         | --                                   |

|                   |         |           |        |                                           |
|-------------------|---------|-----------|--------|-------------------------------------------|
| Cluster-495.851   | -6.5033 | 1.03E-06  | Ycf12  | --                                        |
| Cluster-495.9278  | -5.7186 | 2.69E-04  | --     | CONSTANS-like B-box zinc finger           |
| Cluster-498.0     | -5.6390 | 3.47E-05  | psbE   | Photosystem II cytochrome b559            |
| Cluster-495.7678  | -5.6230 | 6.53E-124 | psaN   | Photosystem I subunit PsaN                |
| Cluster-495.7002  | -5.4544 | 9.90E-104 | psaH   | Photosystem I subunit VI                  |
| Cluster-495.6324  | -5.3253 | 2.42E-70  | psbP   | Oxygen-evolving enhancer protein 2        |
| Cluster-495.8252  | -5.2531 | 1.49E-29  | --     | Photosystem II                            |
| Cluster-495.9999  | -4.6992 | 8.06E-05  | --     | Zinc- peroxisomal                         |
| Cluster-495.827   | -4.6442 | 6.89E-04  | petA   | Apocytochrome f                           |
| Cluster-495.10228 | -4.6211 | 4.34E-02  | psbJ   | Photosystem II PsbJ protein               |
| Cluster-753.0     | -4.4128 | 2.35E-03  | --     | Photosystem II repair PSB27               |
| Cluster-495.866   | -4.0511 | 1.28E-08  | rpsG   | Small subunit protein S7                  |
| Cluster-495.5249  | -4.0063 | 1.02E-46  | psb27  | Photosystem II Psb27 protein              |
| Cluster-495.1246  | -3.9817 | 6.20E-11  | --     | Photosystem I reaction center subunit I   |
| Cluster-495.6056  | -3.8938 | 8.32E-43  | --     | Chloroplast RF12                          |
| Cluster-495.6958  | -3.8390 | 5.22E-43  | psaF   | Photosystem I subunit III                 |
| Cluster-495.7332  | -3.7857 | 2.68E-03  | psbC   | Photosystem II chlorophyll apoprotein     |
| Cluster-495.10100 | -3.6324 | 7.09E-03  | --     | Photosystem II repair PSB27               |
| Cluster-495.6995  | -3.5387 | 1.57E-17  | --     | UPF0603 chloroplastic                     |
| Cluster-495.6505  | -3.4964 | 1.36E-28  | psaK   | Photosystem I subunit X                   |
| Cluster-495.2603  | -3.4907 | 3.76E-24  | --     | --                                        |
| Cluster-495.6979  | -3.3834 | 1.87E-23  | psbR   | Photosystem II 10kDa protein              |
| Cluster-495.8520  | -3.3777 | 6.57E-03  | --     | --                                        |
| Cluster-495.9180  | -3.1148 | 2.64E-16  | rplL   | Large subunit protein L7                  |
| Cluster-495.7894  | -3.0592 | 3.40E-17  | psaB   | Photosystem I chlorophyll a apoprotein    |
| Cluster-495.1037  | -2.9414 | 3.35E-20  | psbP   | Oxygen-evolving enhancer protein 2        |
| Cluster-495.4143  | -2.8547 | 8.51E-45  | psaD   | Photosystem I subunit II                  |
| Cluster-495.6035  | -2.8402 | 3.44E-36  | psaL   | Photosystem I subunit XI                  |
| Cluster-495.6788  | -2.7720 | 1.49E-28  | EIF2S1 | Translation initiation factor 2 subunit 1 |
| Cluster-495.2701  | -2.4827 | 1.02E-15  | --     | --                                        |
| Cluster-495.4418  | -2.3110 | 2.12E-21  | psaG   | Photosystem I subunit V                   |
| Cluster-495.5609  | -2.2904 | 4.52E-18  | psbO   | Oxygen-evolving enhancer protein 1        |
| Cluster-495.9560  | -2.2550 | 6.99E-03  | --     | Photosystem II cytochrome b559 alpha      |

|                  |         |          |        |                                       |
|------------------|---------|----------|--------|---------------------------------------|
| Cluster-495.8596 | -1.9710 | 5.46E-04 | --     | PsbP chloroplastic                    |
| Cluster-495.9554 | -1.9043 | 3.59E-03 | --     | Photosystem II reaction center psb28  |
| Cluster-495.6767 | -1.8672 | 1.71E-05 | --     | --                                    |
| Cluster-495.5836 | -1.8644 | 3.62E-12 | --     | Slug 5-like                           |
| Cluster-495.4536 | -1.8049 | 2.00E-16 | --     | IMPACT family member                  |
| Cluster-495.3452 | -1.7610 | 2.50E-09 | clpB   | Clp protease ATP-binding subunit      |
| Cluster-495.7190 | -1.4895 | 5.90E-11 | psbY   | Photosystem II PsbY protein           |
| Cluster-495.3743 | -1.4058 | 6.61E-12 | --     | --                                    |
| Cluster-495.6413 | -1.3246 | 6.47E-08 | --     | --                                    |
| Cluster-495.4933 | -1.2359 | 4.99E-08 | psb28  | Photosystem II 13kDa protein          |
| Cluster-495.1459 | 1.0994  | 4.45E-04 | COL3A  | Collagen, type III, alpha             |
| Cluster-495.6239 | 1.1139  | 2.46E-05 | --     | Photosystem I reaction center subunit |
| Cluster-495.3769 | 1.1750  | 1.33E-08 | --     | reductase SDR family member 7         |
| Cluster-495.4010 | 1.2834  | 7.21E-08 | PDIA6, | Potein disulfide-isomerase A6         |
| Cluster-495.5479 | 1.5785  | 2.07E-12 | --     | Photosystem I reaction center subunit |
| Cluster-495.3654 | 1.6019  | 4.22E-19 | --     | Dihydrolipoyl dehydrogenase           |

**Supplementary Table S3. DEGs in “Ribosome biogenesis” pathway**

| Gene ID                    | Log <sub>2</sub> (Fold change) | P-adj    | KO Name | KO Description                       |
|----------------------------|--------------------------------|----------|---------|--------------------------------------|
| <b>Ribosome biogenesis</b> |                                |          |         |                                      |
| Cluster-829.0              | -4.7112                        | 3.61E-02 | RPL2    | 50S ribosomal protein L2             |
| Cluster-495.244            | -4.1285                        | 3.49E-02 | RPL34   | 60S ribosomal protein L34            |
| Cluster-495.866            | -4.0511                        | 1.28E-08 | RPS7    | Small subunit ribosomal protein S7   |
| Cluster-495.7112           | -3.9511                        | 8.68E-22 | CTR1    | Serine threonine- kinase CTR1        |
| Cluster-495.1410           | -3.7252                        | 4.04E-17 | RPS6    | Small subunit ribosomal protein S6   |
| Cluster-495.7354           | -3.4826                        | 1.04E-29 | --      | Hypothetical protein                 |
| Cluster-495.6652           | -3.2037                        | 3.59E-22 | EIF3    | Translation initiation factor IF-3   |
| Cluster-495.9180           | -3.1148                        | 2.64E-16 | RPL7    | Large subunit ribosomal protein L7   |
| Cluster-495.8475           | -2.9179                        | 1.83E-10 | RPL18A  | Large subunit ribosomal protein L18A |
| Cluster-495.6595           | -2.5200                        | 5.02E-35 | --      | Hypothetical protein                 |
| Cluster-495.1096           | -2.1232                        | 2.52E-03 | --      | --                                   |
| Cluster-495.6333           | -2.0865                        | 5.66E-10 | cysC    | Adenylylsulfate kinase               |
| Cluster-495.1341           | -2.0406                        | 3.06E-08 | yqfG    | Probable rna maturation factor       |
| Cluster-495.10141          | -1.8808                        | 2.06E-05 | POLH    | DNA polymerase                       |
| Cluster-495.7376           | -1.8124                        | 5.85E-08 | RPL19   | Large subunit ribosomal protein L19  |
| Cluster-495.702            | -1.5495                        | 7.78E-03 | RPL4    | Large subunit ribosomal protein L4   |
| Cluster-495.9613           | -1.5297                        | 2.12E-03 | RPSSD-- | Ribosomal large subunit synthase D   |

|                  |         |          |       |                                              |
|------------------|---------|----------|-------|----------------------------------------------|
| Cluster-495.3907 | -1.4939 | 3.84E-15 | --    | Hypothetical protein                         |
| Cluster-495.1789 | -1.4250 | 1.28E-05 | SNRPE | Small nuclear ribonucleoprotein E            |
| Cluster-495.6690 | -1.3820 | 1.77E-07 | --    | --                                           |
| Cluster-495.2121 | -1.3778 | 3.47E-02 | RPL3  | Large subunit ribosomal protein L3           |
| Cluster-495.5110 | -1.3548 | 8.14E-09 | INO1  | Myo-inositol-1-phosphate synthase            |
| Cluster-495.6827 | -1.1888 | 3.36E-08 | RPS15 | Small subunit ribosomal protein S15          |
| Cluster-495.2500 | -1.1802 | 7.87E-05 | --    | Hypothetical protein                         |
| Cluster-495.7267 | -1.1693 | 3.64E-04 | --    | --                                           |
| Cluster-495.3701 | -1.0849 | 5.30E-05 | UTP21 | U3 small nucleolar RNA-associated protein 21 |
| Cluster-495.5751 | 1.0353  | 5.02E-03 | PL34  | Large subunit ribosomal protein l34e         |
| Cluster-495.4882 | 1.0366  | 6.31E-03 | PL14  | Large subunit ribosomal protein l14e         |
| Cluster-495.5996 | 1.0490  | 4.05E-03 | PS29  | Small subunit ribosomal protein s29e         |
| Cluster-495.8869 | 1.0601  | 3.27E-02 | --    | --                                           |
| Cluster-495.3195 | 1.0677  | 4.18E-07 | RPS12 | Ribosomal protein S12                        |
| Cluster-495.5637 | 1.0915  | 9.34E-03 | RPS6  | Small subunit ribosomal protein s6e          |
| Cluster-495.5611 | 1.0976  | 6.64E-04 | PL13A | Large subunit ribosomal protein L13A         |
| Cluster-495.5652 | 1.1674  | 7.95E-04 | RPL31 | Large subunit ribosomal protein l31e         |
| Cluster-495.1559 | 1.1713  | 1.64E-04 | --    | --                                           |
| Cluster-495.8036 | 1.2193  | 3.30E-03 | --    | Ribosome-binding factor A                    |
| Cluster-495.6197 | 1.2338  | 5.38E-05 | RPL22 | Large subunit ribosomal protein l22e         |
| Cluster-495.3935 | 1.3084  | 5.31E-12 | THOC2 | THO complex subunit 2                        |
| Cluster-495.6944 | 1.3088  | 6.91E-10 | UTP10 | U3 small nucleolar RNA-associated protein 10 |
| Cluster-495.5550 | 1.3294  | 1.97E-07 | RPS23 | Small subunit ribosomal protein s23e         |

**Supplementary Table S4. DEGs in carbon, amino acid and fatty acid metabolism**

| Gene ID                  | Log <sub>2</sub> (Fold change) | P-adj     | KO Name   | KO Description                                   |
|--------------------------|--------------------------------|-----------|-----------|--------------------------------------------------|
| <b>Carbon metabolism</b> |                                |           |           |                                                  |
| Cluster-495.5099         | -5.0936                        | 5.78E-121 | PGK, pgk  | Phosphoglycerate kinase                          |
| Cluster-495.2276         | -4.3041                        | 1.39E-43  | ALDO      | Fructose-bisphosphate aldolase                   |
| Cluster-495.7895         | -4.0597                        | 1.13E-09  | GOT2      | Aspartate aminotransferase                       |
| Cluster-495.4325         | -3.8674                        | 1.08E-66  | gapN      | Glyceraldehyde-3-phosphate dehydrogenase (NADP+) |
| Cluster-495.2903         | -3.5833                        | 1.72E-36  | MDH2      | Malate dehydrogenase                             |
| Cluster-495.6407         | -3.5684                        | 6.23E-08  | cysE      | Serine O-acetyltransferase                       |
| Cluster-495.5815         | -3.0446                        | 6.82E-42  | PRK, prkB | Phosphoribulokinase                              |

|                  |         |          |                 |                                                            |
|------------------|---------|----------|-----------------|------------------------------------------------------------|
| Cluster-495.5677 | -2.9728 | 3.99E-29 | ppdK            | Pyruvate, orthophosphate dikinase                          |
| Cluster-495.5005 | -2.8583 | 3.63E-42 | TPI, tpiA       | Triosephosphate isomerase (TIM)                            |
| Cluster-495.5217 | -2.7963 | 1.37E-29 | ALDO            | Fructose-bisphosphate aldolase, class I                    |
| Cluster-495.6030 | -2.7646 | 4.01E-22 | serA, PHGDH     | D-3-phosphoglycerate dehydrogenase                         |
| Cluster-495.3127 | -2.7627 | 5.82E-26 | G6PD, zwf       | Glucose-6-phosphate 1-dehydrogenase                        |
| Cluster-495.4546 | -2.7251 | 3.02E-38 | TPI, tpiA       | Triosephosphate isomerase (TIM)                            |
| Cluster-495.9524 | -2.6593 | 5.00E-05 | PCCA, pccA      | Propionyl-coa carboxylase alpha chain                      |
| Cluster-495.5985 | -2.5229 | 6.25E-42 | MDH1            | Malate dehydrogenase                                       |
| Cluster-495.3332 | -2.5073 | 2.29E-19 | rpiA            | Ribose 5-phosphate isomerase A                             |
| Cluster-495.1259 | -2.5056 | 8.33E-06 | pckA            | Phosphoenolpyruvate carboxykinase                          |
| Cluster-495.5297 | -2.4966 | 9.22E-21 | PGD, gnd, gntZ  | 6-phosphogluconate dehydrogenase                           |
| Cluster-495.2017 | -2.4122 | 1.06E-03 | pfkA, PFK       | 6-phosphofructokinase 1                                    |
| Cluster-495.5796 | -2.2895 | 4.74E-20 | accC            | Acetyl-coa carboxylase subunit                             |
| Cluster-495.4722 | -2.0943 | 3.43E-13 | cysK            | Cysteine synthase A                                        |
| Cluster-495.6013 | -1.9431 | 7.28E-17 | cysK            | Cysteine synthase A                                        |
| Cluster-495.4145 | -1.8990 | 6.39E-16 | MDH2            | Malate dehydrogenase                                       |
| Cluster-495.4967 | -1.7549 | 3.89E-11 | maeB            | Malate dehydrogenase (oxaloacetate-decarboxylating)(NADP+) |
| Cluster-495.2466 | -1.6897 | 5.48E-09 | RGN             | Gluconolactonase                                           |
| Cluster-495.3492 | -1.6252 | 7.78E-07 | E1.1.1.40, maeB | Malate dehydrogenase (oxaloacetate-decarboxylating)(NADP+) |
| Cluster-495.5038 | -1.6083 | 3.40E-17 | tktA, tktB      | Transketolase                                              |
| Cluster-495.5734 | -1.6082 | 5.41E-16 | LSC1            | Succinyl-coa synthetase alpha subunit                      |

|                  |         |          |             |                                                             |
|------------------|---------|----------|-------------|-------------------------------------------------------------|
| Cluster-495.6521 | -1.6040 | 1.68E-14 | GAPA        | Glyceraldehyde-3-phosphate dehydrogenase (NADP+)            |
| Cluster-495.5974 | -1.5814 | 3.82E-15 | ACO, acnA   | Aconitate hydratase                                         |
| Cluster-495.3018 | -1.5549 | 4.45E-05 | PK, pyk     | Pyruvate kinase                                             |
| Cluster-495.7997 | -1.5260 | 2.68E-06 | PGP, PGLP   | Phosphoglycolate phosphatase                                |
| Cluster-495.1844 | -1.5110 | 3.40E-06 | metF, MTHFR | Methylenetetrahydrofolate reductase                         |
| Cluster-495.7512 | -1.4877 | 1.89E-04 | talA, talB  | Transaldolase                                               |
| Cluster-495.4348 | -1.4680 | 3.68E-08 | DLD         | Dihydrolipoamide dehydrogenase                              |
| Cluster-495.4366 | -1.4535 | 7.04E-09 | gpmI        | 2,3-bisphosphoglycerate-independent phosphoglycerate mutase |
| Cluster-495.8285 | -1.4321 | 2.60E-02 | gpmB        | Probable phosphoglycerate mutase                            |
| Cluster-495.9540 | -1.4116 | 2.97E-02 | PGP, PGLP   | Phosphoglycolate phosphatase                                |
| Cluster-495.6131 | -1.3492 | 6.29E-08 | GPI, pgi    | Glucose-6-phosphate isomerase                               |
| Cluster-495.7334 | -1.3098 | 1.75E-06 | ADH5, adhC  | Alcohol dehydrogenase                                       |
| Cluster-495.4853 | -1.2993 | 1.45E-10 | DLST, sucB  | 2-oxoglutarate dehydrogenase E2                             |
| Cluster-495.6227 | -1.2768 | 9.08E-09 | GAPDH, gapA | Glyceraldehyde 3-phosphate dehydrogenase                    |
| Cluster-495.6949 | -1.2720 | 1.91E-05 | pdhC        | Pyruvate dehydrogenase E2                                   |
| Cluster-495.6523 | -1.2587 | 7.65E-07 | fumC        | Fumarate hydratase, class II                                |
| Cluster-495.5492 | -1.2187 | 2.33E-08 | IDH1, IDH2  | Isocitrate dehydrogenase                                    |
| Cluster-495.6105 | -1.2067 | 8.64E-11 | LSC2        | Succinyl-coa synthetase beta subunit                        |
| Cluster-495.3372 | -1.1984 | 1.25E-04 | ppc         | Phosphoenolpyruvate carboxylase                             |
| Cluster-495.4742 | -1.1802 | 4.04E-11 | cysE        | Serine O-acetyltransferase                                  |
| Cluster-495.2778 | -1.1371 | 2.54E-06 | SDHD, SDH4  | Succinate dehydrogenase                                     |
| Cluster-495.5592 | -1.1265 | 5.10E-05 | PK, pyk     | Pyruvate kinase                                             |



|                                    |         |           |                        |                                                         |
|------------------------------------|---------|-----------|------------------------|---------------------------------------------------------|
| Cluster-495.5250                   | -1.1254 | 1.39E-06  | OGDH,<br>sucA          | 2-oxoglutarate<br>dehydrogenase E1                      |
| Cluster-495.5601                   | -1.0961 | 2.63E-09  | E3.1.3.37              | Sedoheptulose-<br>biphosphatase                         |
| Cluster-495.2869                   | -1.0914 | 3.29E-07  | FBP, fbp               | Fructose-1,6-<br>biphosphatase I                        |
| Cluster-495.6190                   | -1.0435 | 5.51E-05  | GAPDH                  | Glyceraldehyde 3-<br>phosphate dehydrogenase            |
| Cluster-495.9209                   | -1.0261 | 1.47E-02  | ESD, fghA              | S-formylglutathione<br>hydrolase                        |
| Cluster-495.4132                   | -1.0164 | 1.28E-05  | G6PD                   | Glucose-6-phosphate 1-<br>dehydrogenase                 |
| Cluster-495.2709                   | 1.0051  | 2.02E-03  | AGXT                   | Alanine-glyoxylate<br>transaminase                      |
| Cluster-495.5486                   | 1.1196  | 4.71E-08  | GLUD1_2                | Glutamate dehydrogenase<br>(NAD(P)+)                    |
| Cluster-495.5207                   | 1.1296  | 7.49E-07  | E1.1.1.39              | Malate dehydrogenase                                    |
| Cluster-495.5911                   | 1.1565  | 7.75E-08  | FDH                    | Formate dehydrogenase                                   |
| Cluster-495.7215                   | 1.4168  | 6.87E-08  | GGAT                   | Glutamate--glyoxylate<br>aminotransferase               |
| Cluster-495.6647                   | 1.4272  | 7.75E-08  | DAK, TKFC              | Triose/dihydroxyacetone<br>kinase                       |
| Cluster-495.2622                   | 1.7594  | 1.85E-22  | mmsA, iolA,<br>ALDH6A1 | Malonate-semialdehyde<br>dehydrogenase<br>(acetylating) |
| Cluster-495.6811                   | 1.8216  | 2.28E-12  | pdhC                   | Pyruvate dehydrogenase E2                               |
| Cluster-495.10361                  | 4.8009  | 7.22E-11  | DAK, TKFC              | Triose/dihydroxyacetone<br>kinase                       |
| <b>Biosynthesis of amino acids</b> |         |           |                        |                                                         |
| Cluster-870.0                      | -5.6022 | 1.42E-03  | argG, ASS1             | Argininosuccinate synthase                              |
| Cluster-495.7530                   | -5.1509 | 3.04E-11  | TPI, tpiA              | Triosephosphate isomerase<br>(TIM)                      |
| Cluster-495.5099                   | -5.0936 | 5.78E-121 | thrB1                  | Homoserine kinase                                       |
| Cluster-825.0                      | -5.0427 | 1.13E-02  | ACO, acnA              | Aconitate hydratase                                     |
| Cluster-495.2276                   | -4.3041 | 1.39E-43  | argJ                   | Amino-acid N-<br>acetyltransferase                      |
| Cluster-495.7895                   | -4.0597 | 1.13E-09  | OTC                    | Ornithine<br>carbamoyltransferase                       |

|                  |         |          |            |                                             |
|------------------|---------|----------|------------|---------------------------------------------|
| Cluster-495.6407 | -3.5684 | 6.23E-08 | argB       | Acetylglutamate kinase                      |
| Cluster-495.9112 | -3.0144 | 6.42E-11 | pfkA, PFK  | 6-phosphofructokinase 1                     |
| Cluster-495.5005 | -2.8583 | 3.63E-42 | argC       | N-acetyl-gamma-glutamyl-phosphate reductase |
| Cluster-495.5217 | -2.7963 | 1.37E-29 | TPI, tpiA  | Triosephosphate isomerase (TIM)             |
| Cluster-495.6030 | -2.7646 | 4.01E-22 | dapB       | 4-hydroxy-tetrahydrodipicolinate            |
| Cluster-495.4546 | -2.7251 | 3.02E-38 | P5CS       | Pyrroline carboxylate synthetase            |
| Cluster-495.8773 | -2.6734 | 4.67E-08 | PGK        | Phosphoglycerate kinase                     |
| Cluster-495.4720 | -2.6708 | 7.59E-19 | PHGDH      | D-3-phosphoglycerate dehydrogenase          |
| Cluster-495.3332 | -2.5073 | 2.29E-19 | ADT, PDT   | Arogenate dehydratase                       |
| Cluster-495.1604 | -2.4696 | 1.42E-08 | ALDO       | Fructose-bisphosphate aldolase              |
| Cluster-495.9229 | -2.4229 | 1.98E-06 | thrA       | homoserine dehydrogenase 1                  |
| Cluster-495.2017 | -2.4122 | 1.06E-03 | ASP5       | Aspartate aminotransferase                  |
| Cluster-495.3993 | -2.3954 | 7.74E-19 | trpG       | Anthranilate synthase component             |
| Cluster-495.9065 | -2.2275 | 1.16E-05 | cysK       | Cysteine synthase A                         |
| Cluster-495.4722 | -2.0943 | 3.43E-13 | lysA       | Diaminopimelate decarboxylase               |
| Cluster-495.6013 | -1.9431 | 7.28E-17 | GOT2       | Aspartate aminotransferase                  |
| Cluster-495.5038 | -1.6083 | 3.40E-17 | PK, pyk    | Pyruvate kinase                             |
| Cluster-495.8045 | -1.6067 | 6.94E-06 | GAPDH      | Glyceraldehyde 3-phosphate dehydrogenase    |
| Cluster-495.5974 | -1.5814 | 3.82E-15 | cysK       | Cysteine synthase A                         |
| Cluster-495.2271 | -1.5651 | 1.04E-03 | gpmB       | Probable phosphoglycerate                   |
| Cluster-495.3018 | -1.5549 | 4.45E-05 | rpiA       | Ribose 5-phosphate isomerase A              |
| Cluster-495.2447 | -1.5371 | 2.17E-05 | cysE       | Serine O-acetyltransferase                  |
| Cluster-495.7512 | -1.4877 | 1.89E-04 | proC       | Pyrroline-5-carboxylate reductase           |
| Cluster-495.4366 | -1.4535 | 7.04E-09 | talA, talB | Transaldolase                               |
| Cluster-495.8972 | -1.4346 | 1.55E-03 | leuA       | 2-isopropylmalate synthase                  |
| Cluster-495.8285 | -1.4321 | 2.60E-02 | tktA, tktB | Transketolase                               |

|                                |         |          |            |                                                             |
|--------------------------------|---------|----------|------------|-------------------------------------------------------------|
| Cluster-495.6710               | -1.3187 | 9.42E-08 | IDH1, IDH2 | Isocitrate dehydrogenase                                    |
| Cluster-495.6227               | -1.2768 | 9.08E-09 | PK, pyk    | Pyruvate kinase                                             |
| Cluster-495.5492               | -1.2187 | 2.33E-08 | ALDO       | Fructose-bisphosphate<br>aldolase                           |
| Cluster-495.4742               | -1.1802 | 4.04E-11 | GAPDH      | Glyceraldehyde 3-<br>phosphate dehydrogenase                |
| Cluster-495.5592               | -1.1265 | 5.10E-05 | gpmI       | 2,3-bisphosphoglycerate-<br>independent<br>phosphoglycerate |
| Cluster-495.2179               | -1.1187 | 8.28E-06 | trpC       | 3-glycerol phosphate<br>synthase                            |
| Cluster-495.6190               | -1.0435 | 5.51E-05 | cysE       | Serine O-acetyltransferase                                  |
| Cluster-495.4437               | -1.0384 | 9.24E-06 | proC       | Pyrroline-5-carboxylate<br>reductase                        |
| Cluster-495.6855               | -1.0211 | 9.92E-06 | trpC       | 3-glycerol phosphate<br>synthase                            |
| Cluster-495.4071               | 1.3639  | 1.42E-05 | argAB      | Amino-acid N-<br>acetyltransferase                          |
| Cluster-495.7215               | 1.4168  | 6.87E-08 | GGAT       | Glutamate--glyoxylate<br>aminotransferase                   |
| Cluster-495.6465               | 1.7988  | 5.96E-22 | ilvE       | Branched-chain amino acid<br>aminotransferase               |
| Cluster-495.5645               | 2.2190  | 1.32E-29 | dapF       | Diaminopimelate<br>epimerase                                |
| <b>Fatty acid biosynthesis</b> |         |          |            |                                                             |
| Cluster-495.4487               | -4.8270 | 2.34E-47 | fabI       | Enoyl-[acyl-carrier-protein]<br>reductase                   |
| Cluster-495.3921               | -3.6122 | 2.01E-44 | fabD       | CoA-acyl carrier protein<br>transacylase                    |
| Cluster-495.2280               | -3.3685 | 1.10E-37 | fabG       | 3-oxoacyl-[acyl-carrier-<br>protein] reductase              |
| Cluster-495.3591               | -3.0147 | 1.54E-30 | fabF       | 3-oxoacyl-[acyl-carrier-<br>protein] synthase II            |
| Cluster-495.5787               | -2.3116 | 3.35E-14 | fadD       | Long-chain acyl-coa<br>synthetase                           |
| Cluster-495.5796               | -2.2895 | 4.74E-20 | accC       | Acetyl-CoA carboxylase                                      |

|                  |         |          |      |                                               |
|------------------|---------|----------|------|-----------------------------------------------|
| Cluster-495.339  | -2.1592 | 2.17E-04 | fabZ | 3-hydroxyacyl-[acyl-carrier-protein] synthase |
| Cluster-495.5391 | -1.8857 | 3.92E-11 | fabH | 3-oxoacyl-[acyl-carrier-protein] synthase 3   |
| Cluster-495.5077 | -1.3533 | 7.98E-07 | FATA | Fatty acyl-ACP thioesterase A                 |
| Cluster-495.6352 | -1.3369 | 5.07E-14 | fabF | 3-oxoacyl-[acyl-carrier-protein] synthase I   |

**Supplementary Table S5. Primers used for qRT-PCR in this study**

| Primer name        | Primer sequence (5'-3') |
|--------------------|-------------------------|
| Cluster-495.4143 F | GTTCCCCAACGGCGAGGTG     |
| Cluster-495.4143 R | GATGGACACGGGGTTCACG     |
| Cluster-495.6485 F | GGCTGAGCTGAAGGTGAAGGAG  |
| Cluster-495.6485 R | TTGGACCAGTTGGCGTAGGG    |
| Cluster-495.3492 F | AGAACATCTTCCTGGTGGACAGC |
| Cluster-495.3492 R | TGGGCGTAGGGTAGCTTGTGA   |
| Cluster-495.7973 F | GCACGGCTTTCGAGCATCG     |
| Cluster-495.7973 R | GCCTTGGGAGACAGCGACAGAG  |
| Cluster-495.8475 F | GATAGTGGAGACAGGCCAGAGGC |
| Cluster-495.8475 R | AGCAGAGCGGGAGCGGAAGT    |
| Cluster-495.7512 F | TGACAGCGAAGACGTGGAGG    |
| Cluster-495.7512 R | GAATGGTTGGATTGGTCGTAAAA |
| Cluster-495.6811 F | GCGTTCAGCGAGTCCAGAT     |
| Cluster-495.6811 R | CAGCCTCACTTCTATCACAACCA |
| Cluster-495.165 F  | TGCTTGTTGGCTGCTTTGCTG   |
| Cluster-495.165 R  | AGCGGATGATGCCGAGGTGT    |
| Cluster-495.5469 F | CCGCACCGAGTGCTTTGAG     |
| Cluster-495.5469 R | CACGCAGTGGATGGGCTTGT    |
| Cluster-495.54 F   | ACCTCTGCCACTTCCGCTGTTG  |
| Cluster-495.54 R   | TCCTCTAGCACGCCGTCCTCAA  |
| ApActin F          | GGCTACGTGGCGCTCGACTA    |
| ApActin R          | CGTCATGGAAGGCTGGAACAG   |
